# Supplementary material
Source: PubMed Central journal article supplement (PMC3685490)
Supplement: NIHMS476047-supplement-02.pdf [file NIHMS476047-supplement-02.pdf]

Type of file: figure

Label: Fig. S1

Filename: figs1.jpg

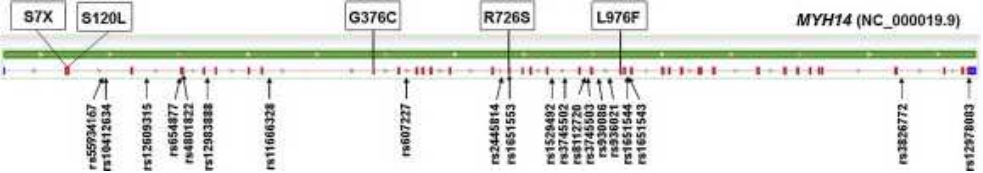

Type of file: figure

Label: Fig. S12

Filename: figs2.jpg

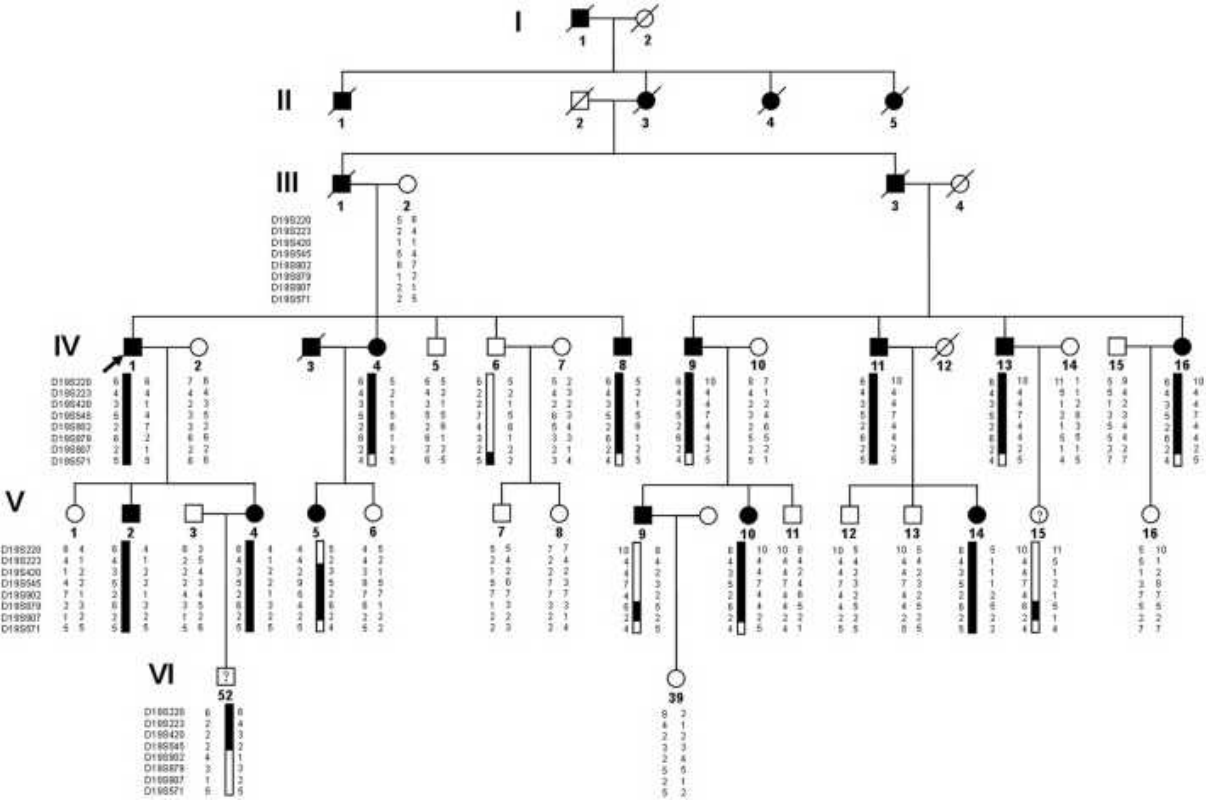

Type of file: table

Label: Table S1

Filename: mmc2.doc

**Table S1. Summary of clinical data for hearing impaired members in family Z002**

| <b>Subject</b> | <b>Sex</b> | <b>Age of test (year)</b> | <b>Age of onset (year)</b> | <b>PTA (dB HL)<sup>a</sup></b> | <b>Hearing impairment</b> | <b>Audiogram</b> |
|----------------|------------|---------------------------|----------------------------|--------------------------------|---------------------------|------------------|
| IV:1           | M          | 61                        | 27                         | 92.5                           | profound                  | downslope        |
| IV:13          | M          | 42                        | 23                         | 80.0                           | severe                    | flat             |
| IV:8           | M          | 50                        | 25                         | 76.3                           | severe                    | downslope        |
| IV:9           | M          | 52                        | 20                         | 72.5                           | severe                    | flat             |
| IV:16          | F          | 43                        | 20                         | 72.5                           | severe                    | flat             |
| IV:11          | M          | 47                        | 40                         | 58.8                           | moderate                  | downslope        |
| IV:4           | F          | 48                        | 22                         | 30.0                           | mild                      | downslope        |
| V:9            | M          | 30                        | 23                         | 76.3                           | severe                    | flat             |
| V:4            | F          | 29                        | 24                         | 56.3                           | moderate                  | downslope        |
| V:10           | F          | 26                        | 20                         | 35.0                           | mild                      | downslope        |
| V:2            | M          | 26                        | 24                         | 28.8                           | mild (2-8kHz)             | flat             |
| V:5            | F          | 24                        | 24 <sup>b</sup>            | 26.3                           | mild (2-8kHz)             | downslope        |
| V:14           | F          | 25                        | 25 <sup>b</sup>            | 25.5                           | mild                      | flat             |

<sup>a</sup> PTA, pure-tone air-conduction averages (0.5, 1, 2 and 4 kHz) for the better-hearing ear of affected subjects in family Z002.

<sup>b</sup> Diagnosed at the time of test.

Type of file: table

Label: Table S2

Filename: mmc3.doc

**Table S2. Two-point LOD scores between 19q microsatellite markers for family Z002**

| Markers | Genetic distance<br>(cM) | LOD score at $\theta=?$ |       |       |       |       |      |      |      |
|---------|--------------------------|-------------------------|-------|-------|-------|-------|------|------|------|
|         |                          | 0.00                    | 0.01  | 0.05  | 0.1   | 0.2   | 0.3  | 0.4  | 0.5  |
| D19S220 | 62.03                    | -infini                 | 1.01  | 1.50  | 1.54  | 1.31  | 0.92 | 0.47 | 0.00 |
| D19S223 | 64.16                    | -infini                 | 1.20  | 1.19  | 1.10  | 0.83  | 0.49 | 0.16 | 0.00 |
| D19S420 | 66.30                    | 3.03                    | 4.88  | 4.52  | 3.13  | 2.48  | 1.65 | 0.72 | 0.00 |
| D19S545 | 71.46                    | -0.21                   | 4.77  | 4.42  | 3.04  | 2.40  | 1.56 | 0.63 | 0.00 |
| D19S902 | 72.72                    | 3.54                    | 2.94  | 2.69  | 2.36  | 1.69  | 1.00 | 0.38 | 0.00 |
| D19S879 | 75.41                    | 5.30                    | 5.17  | 4.80  | 4.36  | 3.33  | 2.22 | 1.02 | 0.00 |
| D19S907 | 78.08                    | 1.16                    | 1.13  | 1.04  | 0.93  | 0.70  | 0.47 | 0.23 | 0.00 |
| D19S571 | 84.08                    | -infini                 | -4.80 | -2.14 | -0.50 | -0.03 | 0.11 | 0.11 | 0.00 |



Type of file: table

Label: Table S3

Filename: mmc4.doc

**Table S3. SNPs identified in candidate genes of family Z002 (partial results shown)**

| Candidate gene  | SNP Site in mRNA | Nucleotide position* | dbSNP(rs#) |
|-----------------|------------------|----------------------|------------|
| <i>CEACAM16</i> | 1421C>T(p.T405T) | 9516                 | rs61744497 |
| <i>KCNA7</i>    | 922C>G(P189P)    | 2674                 | rs1611775  |
|                 | 2035G>A          | 3787(3'UTR)          | rs3810186  |
|                 | 2500G>A          | 4252(3'UTR)          | rs4802547  |
|                 | 3090T>C          | 4842(3'UTR)          | rs11673003 |
|                 | 3495G>A          | 5247(3'UTR)          | rs35203905 |
|                 | 4361G>A          | 6113(3'UTR)          | rs4802546  |
| <i>KPTN</i>     | 942C>T(P302P)    | 7924                 | rs2293424  |
| <i>ERCC1</i>    | IVS1-114G>T      | 851                  | rs3212924  |
|                 | 524T>C(N59N)     | 4125                 | rs17359303 |
|                 | IVS4+86G>A       | 4282                 | rs3212955  |
|                 | IVS5+33C>A       | 5455                 | rs3212961  |
|                 | IVS9-110A>G      | 14685                | rs1007616  |

\*The position is relative to the gene sequence.

Type of file: table

Label: Table S4

Filename: mmc5.doc

**Table S4. PCR primer pairs for candidate genes screening  
(partial results shown)**

| <b>Candidate gene</b> | <b>Screened region</b> | <b>Forward primer (5'-3')</b> | <b>Reverse primer (5'-3')</b> | <b>PCR products size (bp)</b> |
|-----------------------|------------------------|-------------------------------|-------------------------------|-------------------------------|
| <i>CEACAM16</i>       | Exon1                  | aaatggcaaatccccttct           | ggcacctgtaatcccagcta          | 497                           |
|                       | Exon2                  | ctcgatccctccaaattcag          | tgctcacaccttcctctct           | 284                           |
|                       | Exon3                  | cccgagcctgagtctctct           | ttgagaaggagatgggaagg          | 487                           |
|                       | Exon4                  | caagatggcctccaggatta          | catccatgaggttggacact          | 499                           |
|                       | Exon5                  | ctccactcctcctcctct            | cttaaccttcgcagcctgat          | 399                           |
|                       | Exon6                  | gacaccatgccagatgcag           | agcctgatggaggaagcaa           | 462                           |
|                       | Exon7                  | cctggtcctccatctctctg          | gtgcacaccagactgagaa           | 385                           |
| <i>KCNN4</i>          | Exon1                  | gggatactgcctgcttgcta          | cagaccaagagtctgacc            | 794                           |
|                       | Exon2                  | tctcagaaccgacacatca           | tcagatcaggaggaggagga          | 349                           |
|                       | Exon3                  | ggcacaccccacttatctca          | gttctctcaccacagttga           | 712                           |
|                       | Exon4                  | gatgggagggtataga              | gagaatggggctctgg              | 378                           |
|                       | Exon5、6                | aactggggatggctc               | gatccaggtgaga                 | 646                           |
|                       | Exon7                  | ctctttcagctcttcg              | gatctgtgccttcat               | 411                           |
|                       | Exon8                  | agtggtaggtggtaaa              | gccacatagggtgctg              | 403                           |
|                       | Exon9                  | ttgtctggctgtccat              | gtctgccagttaggag              | 794                           |
| <i>KCNA7</i>          | Exon1-1                | atgcttcccactgggtgtctc         | ggcctcactctgtttccag           | 445                           |
|                       | Exon1-2                | cctcagttccccgtctgta           | agaccatctggctaacacg           | 550                           |
|                       | Exon1-3                | aggttcatgccattctctg           | gattgaggccaggagtcaa           | 558                           |
|                       | Exon1-4                | gagtgacagtggtgcaatcat         | cactcccattctcccetaca          | 553                           |
|                       | Exon1-5                | tctctcccttgggtctctg           | ctcataggccatgctgaat           | 543                           |
|                       | Exon1-6                | tacatgatgcttcccactg           | ggccatgtgggtcaagtta           | 547                           |
|                       | Exon1-7                | gcccacagaaccctacaag           | acgagtggggaacactgag           | 553                           |
|                       | Exon1-8                | aaggctccatgagctttgc           | gggtgactcccatttact            | 641                           |
|                       | Exon1-9                | ctggcagggaaatagtcagc          | tctgggataaccaggtcacg          | 758                           |
|                       | Exon2-1                | gccttatgattggccaggt           | cttcccggacactctgcta           | 541                           |
|                       | Exon2-2                | tagaaggccacctctccag           | tgaagcctgattctgacgaa          | 677                           |
|                       | Exon2-3                | ctagcagagtgtccgggaag          | tgaagcctgattctgacgaa          | 508                           |
| <i>KPTN</i>           | Exon1                  | ccttggtccagaaatggaaa          | cagtgacccccctaaaacca          | 589                           |
|                       | Exon2                  | tgagcctagggttcaggatt          | ggctcagtggaactcacat           | 340                           |

|            |                      |                      |     |
|------------|----------------------|----------------------|-----|
| Exon3、 4   | gtacctagagccccctccac | ttccagaaggggaaacaga  | 451 |
| Exon5、 6   | ccctgggtctagtgtctgga | gagggtgagtcacctctt   | 588 |
| Exon7      | atccaggaggaatcaagcag | cctcatcctcaaccact    | 358 |
| Exon8      | ggaaagtcgatggttcagg  | ggatccaggagagaggact  | 288 |
| Exon9      | gtagaggcggggtttatca  | tccagctctgggtaatcac  | 302 |
| Exon10、 11 | acccttgctgggtctatg   | aggaactgcctcctgaaat  | 694 |
| Exon12     | aattcgcttaagccactcc  | tgggttctaccctgggatct | 766 |
